# Supplementary material
Source: publisher site journal article supplement (https://www.kjim.org/upload/media/kjim-2023-350-Supplementary-Fig-4.pdf)
Supplement: Supplementary file 1 [file kjim-2023-350-Supplementary-Fig-4.pdf]

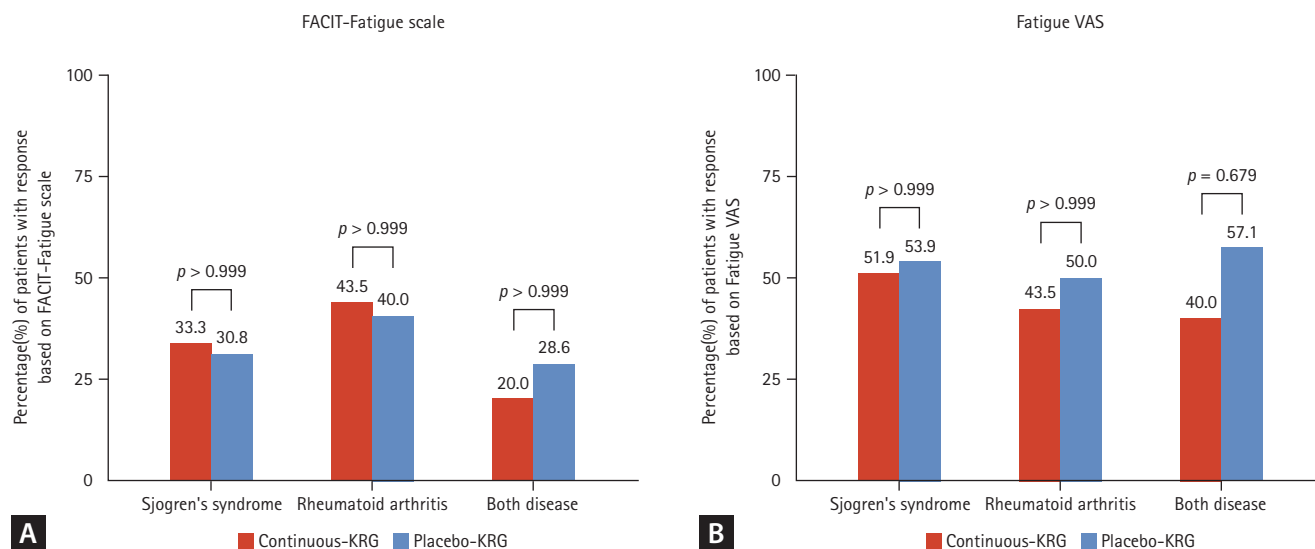

**Supplementary Figure 4.** Comparison of response rates according to underlying disease during Week 0–24. (A) Response rate based on FACIT-Fatigue scale according to underlying disease. (B) Response rate based on Fatigue VAS according to underlying disease. KRG, Korean Red Ginseng; FACIT-Fatigue, The Functional Assessment of Chronic Illness-Fatigue; VAS, visual analog scale.
